# Supplementary material for: Chiral discrimination of l-DOPA vial/d-tryptophan decorated carbon quantum dots
Source: Royal Society of Chemistry journal article supplement (doi:10.1039/d3ma00757j), 2024-01-01
Supplement: d3ma00757j1.pdf [file d3ma00757j1.pdf]

## Supporting Information

# Chiral Discrimination of L-DOPA *via* L/D-Tryptophan Decorated Carbon Quantum Dots

Aram Rezaei,<sup>\*ϕ</sup> Mohammed Ahmed Hamad,<sup>Δ</sup> Hadi Adibi,<sup>€</sup> Huajun Zheng,<sup>§</sup> Khdir Hamza Qadir<sup>Δ</sup>

*ϕ Nano Drug Delivery Research Center, Health Technology Institute, Kermanshah University of Medical Sciences, Kermanshah, Iran.*

*Δ Students Research Committee, Kermanshah University of Medical Sciences, Kermanshah, Iran*

*€ Pharmaceutical Sciences Research Center, Health Institute, Kermanshah University of Medical Sciences, Kermanshah, Iran*

*§ Department of Applied Chemistry, Zhejiang University of Technology, Hangzhou, 310032, China.*

Corresponding Author: Aram Rezaei, Email: [aram.rezaei@gmail.com](mailto:aram.rezaei@gmail.com), aram.rezaei@kums.ac.ir.

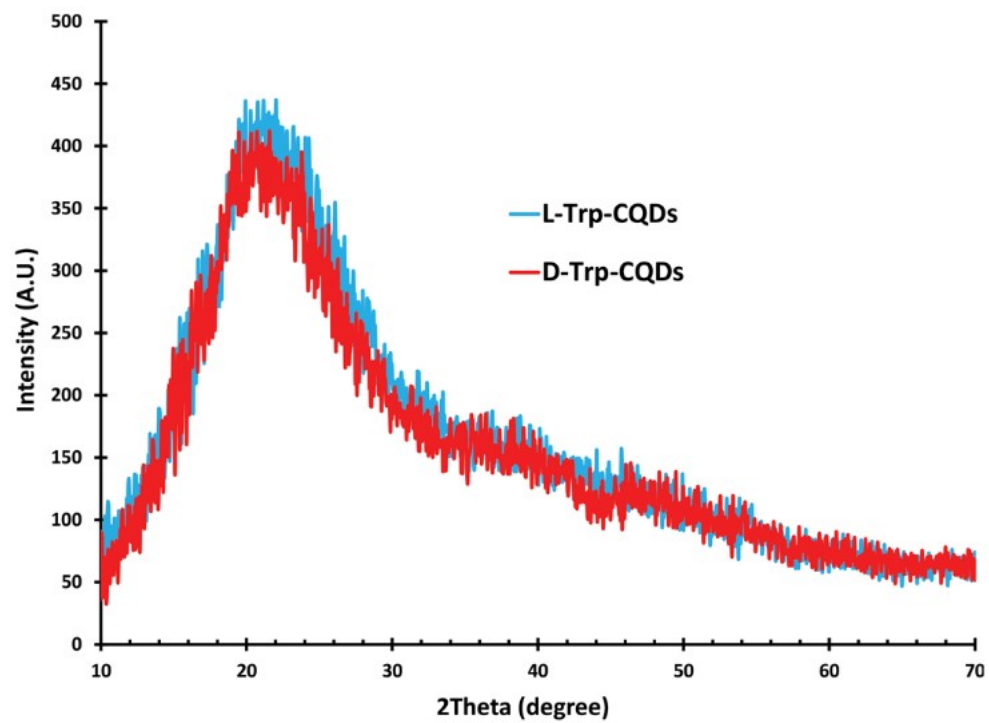

Figure S1: The XRD diagram for L- and D-Trp-CQDs

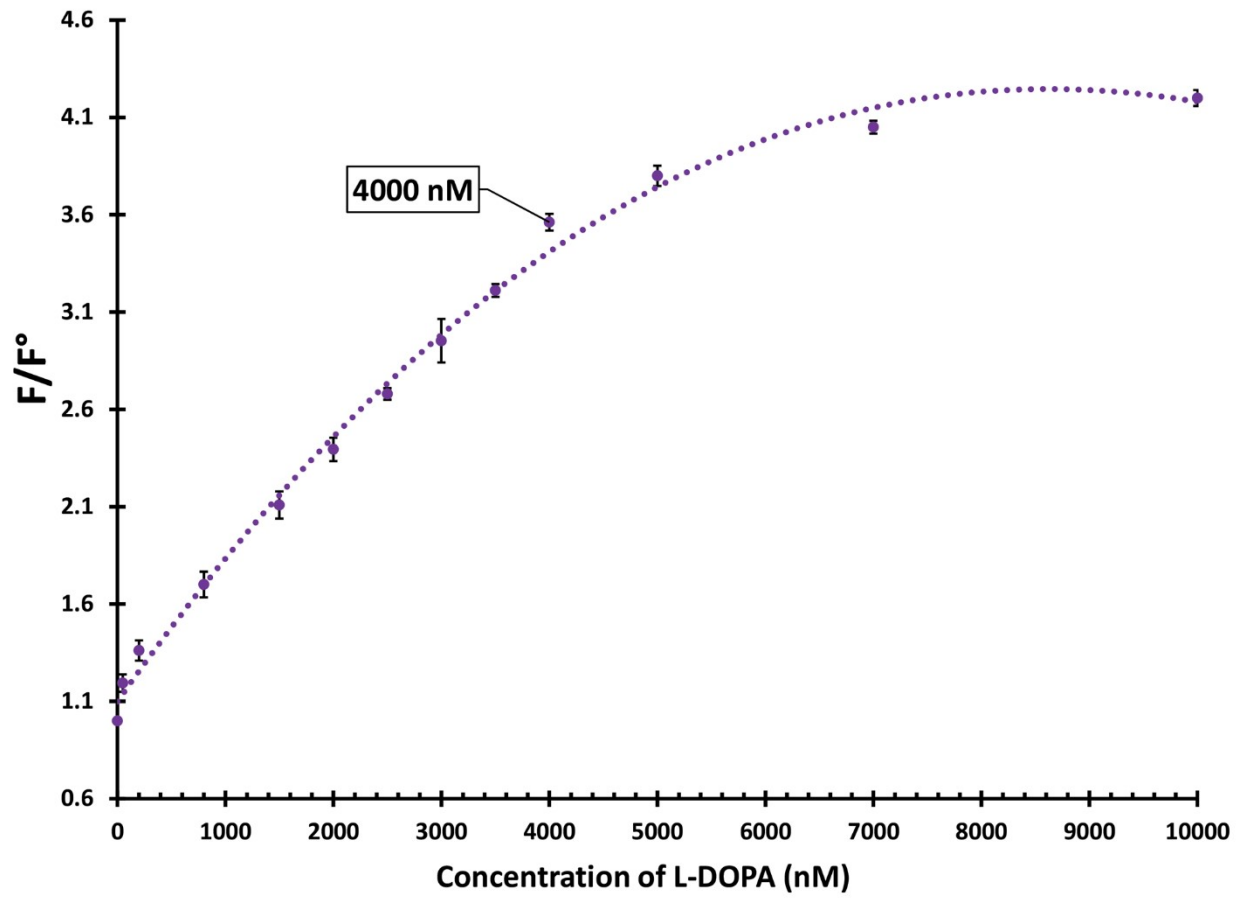

Figure S2: The  $F/F^\circ$  ratio in the presence of different concentration of L-DOPA
